# Supplementary material for: Molecular etiology and genotype-phenotype correlation of Chinese Han deaf patients with type I and type II Waardenburg Syndrome
Source: PubMed Central journal article supplement (PMC5069774; doi:10.1038/srep35498), 2016-10-19
Supplement: srep35498-s1.pdf [file srep35498-s1.pdf]

# **Molecular etiology and genotype-phenotype correlation of Chinese Han deaf patients with type I and type II Waardenburg Syndrome**

Lianhua Sun<sup>§1,2,3</sup>, Xiaohua Li<sup>§4</sup>, Jun Shi<sup>§1,2,3</sup>, Xiuhong Pang<sup>5</sup>, Yechen Hu<sup>6</sup>, Xiaowen Wang<sup>1,2,3</sup>, Hao Wu<sup>\*1,2,3,7</sup> Tao Yang<sup>\*1,2,3</sup>

<sup>1</sup>Department of Otolaryngology–Head and Neck Surgery, Xinhua Hospital, Shanghai Jiaotong University School of Medicine, Shanghai, China

<sup>2</sup>Ear Institute, Shanghai Jiaotong University School of Medicine, Shanghai, China

<sup>3</sup>Shanghai Key Laboratory of Translational Medicine on Ear and Nose Diseases, Shanghai, China

<sup>4</sup>Department of Otology, the First Affiliated Hospital of Zhengzhou University, Zhengzhou, Henan, China

<sup>5</sup>Department of Otorhinolaryngology-Head and Neck Surgery, Taizhou People's Hospital, Jiangsu Province, China

<sup>6</sup>High School Affiliated to Fudan University, Shanghai, China

<sup>7</sup>Department of Otorhinolaryngology-Head and Neck Surgery, Shanghai Ninth People's Hospital, Shanghai Jiaotong University School of Medicine, Shanghai, China

<sup>§</sup>Those authors contributed equally to this work

## **\*Corresponding Authors:**

Tao Yang, Ear Institute, Shanghai Jiaotong University School of Medicine, Shanghai, China.

Email: yangtfxl@sina.com, Tel: 86-21-25078893, Fax: 86-21-65152394

Hao Wu, Department of Otolaryngology-Head & Neck Surgery, Shanghai Ninth People's Hospital, Shanghai Jiaotong University School of Medicine, Shanghai, China. Email:

wuhao622@sina.cn, Tel: 86-21-55570010, Fax: +86-21-65152394

**Supplementary Table S1.** Analysis of gender and age as potential confounding effects on the excessive freckle phenotype in WS2 patients with *MITF* and *SOX10* mutations.

|                                                                 | <b>Patient</b> | <b>Mutations</b> | <b>Gender</b> | <b>Age</b>    |
|-----------------------------------------------------------------|----------------|------------------|---------------|---------------|
| Patients with <i>MITF</i> mutations and excessive freckles      | W14-1          | p.R110X          | F             | 15            |
|                                                                 | W16-4          | p.X420Qext33     | M             | 27            |
|                                                                 | W16-3          | p.X420Qext33     | F             | 29            |
|                                                                 | W16-5          | p.X420Qext33     | M             | 61            |
|                                                                 | W18-1          | c.710+1G>T       | F             | 31            |
|                                                                 | W19-1          | p.R270X          | M             | 3             |
|                                                                 | W19-4          | p.R270X          | M             | 35            |
|                                                                 | W19-7          | p.R270X          | F             | 23            |
|                                                                 | W19-8          | p.R270X          | F             | 20            |
|                                                                 | W19-9          | p.R270X          | M             | 49            |
|                                                                 | W19-10         | p.R270X          | F             | 51            |
|                                                                 | W19-11         | p.R270X          | M             | 60            |
|                                                                 | W21-1          | p.R255X          | M             | 31            |
|                                                                 | W44-1          | c.494delC        | F             | 8             |
|                                                                 | W44-2          | c.494delC        | M             | 30            |
|                                                                 | W46-1          | p.R255X          | M             | 6             |
| Patients with <i>MITF</i> mutations but not excessive freckles  | W14-2          | p.R110X          | F             | 9             |
|                                                                 | W46-2          | p.R255X          | M             | 39            |
|                                                                 | D2-1           | p.R259X          | M             | 3             |
|                                                                 | W33-1          | p.R214Q          | M             | 3             |
|                                                                 | W33-3          | p.R214Q          | F             | 28            |
| Patients with <i>SOX10</i> mutations but not excessive freckles | W8-1           | c.1083delG       | M             | 17            |
|                                                                 | W10-1          | c.1074delA       | F             | 19            |
|                                                                 | W11-1          | c.495-496insA    | F             | 18            |
|                                                                 | W12-1          | c.36-54del19bp   | F             | 2             |
|                                                                 | D680-1         | c.400delC        | M             | 1             |
|                                                                 | W25-1          | c.1095delG       | M             | 9             |
|                                                                 | W47-1          | c.690delC        | M             | 1             |
|                                                                 | W3-1           | p.S40X           | M             | 18            |
|                                                                 | W3-2           | p.S40X           | F             | 14            |
|                                                                 | W4-1           | p.Q197X          | F             | 13            |
|                                                                 | W4-2           | p.Q197X          | F             | 39            |
|                                                                 | W23-1          | p.W85X           | M             | 5             |
|                                                                 | W26-1          | c.396-397ins21   | M             | 2             |
| W17-1                                                           | p.W114R        | M                | 1             |               |
| W27-1                                                           | p.N109S        | M                | 4             |               |
| <b><i>P-values</i>*</b>                                         |                |                  | <b>0.8129</b> | <b>0.1559</b> |

\*The confounding effects of gender and age on the excessive freckle phenotype were tested by logistic regression analysis as independent variables.
